# Supplementary material for: Access to primary health care for acute vascular events in rural low income settings: a mixed methods study
Source: Springer Nature journal article supplement (doi:10.1186/s12913-017-1987-8), 2017-01-17
Supplement: MOESM2 [file 12005608]

## Health Care seeking pattern during fatal and non-fatal acute vascular events

| IDENTIFICATION                                                                                                                                                                                           |                                                                                                                           |                                                                                                                                                                                                          |  |
|----------------------------------------------------------------------------------------------------------------------------------------------------------------------------------------------------------|---------------------------------------------------------------------------------------------------------------------------|----------------------------------------------------------------------------------------------------------------------------------------------------------------------------------------------------------|--|
| <b>Fatal Case</b> <b>Study ID</b> <input type="text"/> <input type="text"/> <input type="text"/> <input type="text"/>                                                                                    | <b>Non-Fatal Case</b> <b>Study ID</b> <input type="text"/> <input type="text"/> <input type="text"/> <input type="text"/> |                                                                                                                                                                                                          |  |
| <b>Name:</b> .....                                                                                                                                                                                       |                                                                                                                           | <b>Name:</b> .....                                                                                                                                                                                       |  |
| <b>CID:</b> <input type="text"/> |                                                                                                                           | <b>CID:</b> <input type="text"/> |  |
| <b>RID:</b> <input type="text"/> |                                                                                                                           | <b>RID:</b> <input type="text"/> |  |
| <b>Date of birth:</b> <input type="text"/>            |                                                                                                                           | <b>Date of birth:</b> <input type="text"/>            |  |
| <b>Day                      Month                      Year</b>                                                                                                                                          |                                                                                                                           | <b>Day                      Month                      Year</b>                                                                                                                                          |  |
| <b>Date of death:</b> <input type="text"/>            |                                                                                                                           | <b>Date of death:</b> <input type="text"/>            |  |
| <b>Day                      Month                      Year</b>                                                                                                                                          |                                                                                                                           | <b>Day                      Month                      Year</b>                                                                                                                                          |  |
| <b>Date of Interview:</b> <input type="text"/>        |                                                                                                                           | <b>Date of Interview:</b> <input type="text"/>        |  |
| <b>Day                      Month                      Year</b>                                                                                                                                          |                                                                                                                           | <b>Day                      Month                      Year</b>                                                                                                                                          |  |
| <b>The Respondent is a</b>                                                                                                                                                                               |                                                                                                                           | <b>a) Non-Fatal Stroke/MI Case ----- 1</b> <input type="checkbox"/>                                                                                                                                      |  |
|                                                                                                                                                                                                          |                                                                                                                           | <b>b) Caregiver of a fatal/Non-Fatal Stroke/MI Case ---- 2</b> <input type="checkbox"/>                                                                                                                  |  |

| SL #                                 | Question                                                                                                                                                                                                                                                                                                                                                               | Code                                                                                                                                                                                                                                                        | Result                                    | Skip code |
|--------------------------------------|------------------------------------------------------------------------------------------------------------------------------------------------------------------------------------------------------------------------------------------------------------------------------------------------------------------------------------------------------------------------|-------------------------------------------------------------------------------------------------------------------------------------------------------------------------------------------------------------------------------------------------------------|-------------------------------------------|-----------|
| <b>Socio-demographic Information</b> |                                                                                                                                                                                                                                                                                                                                                                        |                                                                                                                                                                                                                                                             |                                           |           |
| 1.                                   | What is your/patient's sex? (আপনার/রোগীর লিঙ্গ?)                                                                                                                                                                                                                                                                                                                       | Male (পুরুষ)----- 1<br>Female (মহিলা)----- 2                                                                                                                                                                                                                | <input type="checkbox"/>                  |           |
| 2.                                   | What is your/patients marital status? (আপনার/ রোগীর বৈবাহিক অবস্থা?)                                                                                                                                                                                                                                                                                                   | Never married (কখনও বিয়ে হয়নি)----- 1<br>Married (বিবাহিত)----- 2<br>Separated/Divorced (বিচ্ছিন্ন/ স্বামী পরিত্যক্তা)----- 3<br>Widow/Widower (বিধবা/ বিপত্নীক)----- 4                                                                                   | <input type="checkbox"/>                  |           |
| 3.                                   | Do you/patient have any children? (আপনার/ রোগীর কোন সন্তান আছে?)                                                                                                                                                                                                                                                                                                       | Yes (হ্যাঁ) ..... 1<br>No (না) ..... 2                                                                                                                                                                                                                      | <input type="checkbox"/>                  | If 2→Q4   |
|                                      | 3.a Sons [ছেলে]                                                                                                                                                                                                                                                                                                                                                        | ----- Number (সংখ্যা)                                                                                                                                                                                                                                       | <input type="text"/> <input type="text"/> |           |
|                                      | 3.b Daughters [মেয়ে]                                                                                                                                                                                                                                                                                                                                                  | ----- Number (সংখ্যা)                                                                                                                                                                                                                                       | <input type="text"/> <input type="text"/> |           |
| 4.                                   | What is your religion? (আপনার ধর্ম কি?)                                                                                                                                                                                                                                                                                                                                | Islam (মুসলমান)----- 1<br>Hindu (হিন্দু)----- 2<br>Christian (খ্রীষ্টান)----- 3<br>Buddist (বৌদ্ধ)----- 4<br>Other (Specify) (অন্যান্য, উল্লেখ করুন)-- 9                                                                                                    | <input type="checkbox"/>                  |           |
| 5.                                   | What is your occupation? (আপনার পেশা কি?)                                                                                                                                                                                                                                                                                                                              |                                                                                                                                                                                                                                                             |                                           |           |
|                                      | <b>1 = Unskilled manual:</b> (দিনমজুর, রিক্সাচালক, কৃষি শ্রমিক ইত্যাদি)<br><b>2 = Skilled manual:</b> (টেম্পু চালক, মেকানিক, অপারেটর, কাঠ মিস্ত্রি, পুলিশ, আর্মি ইত্যাদি)<br><b>3 = Non-manual:</b> (দোকানদার, জমির মালিক কিন্তু জমিতে কাজ করে না, বসে বসে চাকুরী করা, ব্যবসায়ী, শ্রমিক নেতা ইত্যাদি)<br><b>4 = Professional=</b> (ডাক্তার, প্রকৌশলী, শিক্ষক ইত্যাদি) | Unskilled manual [অদক্ষ কায়িক] .....1<br>Skilled manual [দক্ষ কায়িক] .....2<br>Non manual [কায়িক নয়] .....3<br>Professional [পেশাদার] .....4<br>Housewife [গৃহিনী] .....5<br>Unemployed [বেকার] .....6<br>Other (Specify) (অন্যান্য, উল্লেখ করুন).....9 | <input type="checkbox"/>                  |           |

| SL #                                                       | Question                                                                                                                                                                                                                                                                                                                                                                 | Code                                                                                                                                                                                                                                                                                                                                                                                                                | Result                   | Skip code |
|------------------------------------------------------------|--------------------------------------------------------------------------------------------------------------------------------------------------------------------------------------------------------------------------------------------------------------------------------------------------------------------------------------------------------------------------|---------------------------------------------------------------------------------------------------------------------------------------------------------------------------------------------------------------------------------------------------------------------------------------------------------------------------------------------------------------------------------------------------------------------|--------------------------|-----------|
| 6.                                                         | Who is the head of your/patient family?<br>[আপনার /রোগীর পরিবারের প্রধান কে? ]                                                                                                                                                                                                                                                                                           | Self, Male [পুরুষ, অংশগ্রহণকারী নিজে] ----- 1<br>Self, Female [মহিলা, অংশগ্রহণকারী নিজে]-- 2<br>Else, Male [অন্য পুরুষ] ----- 3<br>Else, Female [অন্য মহিলা]----- 4                                                                                                                                                                                                                                                 | <input type="checkbox"/> |           |
| 7.                                                         | What is the main occupation of the household head? [পরিবার প্রধানের পেশা কি?]                                                                                                                                                                                                                                                                                            |                                                                                                                                                                                                                                                                                                                                                                                                                     |                          |           |
|                                                            | <b>1 = Unskilled manual:</b> (দিনমজুর, রিক্সাচালক, কৃষি শ্রমিক ইত্যাদি)<br><b>2 = Skilled manual:</b> (টেম্পু চালক, মেকানিক, অপারেটর, কার্ট মিস্ত্রি, পুলিশ, আর্মি ইত্যাদি)<br><b>3 = Non-manual:</b> (দোকানদার, জমির মালিক কিন্তু জমিতে কাজ করে না, বসে বসে চাকুরী করা, ব্যবসায়ী, শ্রমিক নেতা ইত্যাদি)<br><b>4 = Professional=</b> (ডাক্তার, প্রকৌশলী, শিক্ষক ইত্যাদি) | Unskilled manual [অদক্ষ কায়িক] .....1<br>Skilled manual [দক্ষ কায়িক] .....2<br>Non manual [কায়িক নয়] .....3<br>Professional [পেশাদার] .....4<br>Housewife [গৃহিনী] .....5<br>Unemployed [বেকার] .....6<br>Other (Specify) (অন্যান্য, উল্লেখ করুন).....9                                                                                                                                                         | <input type="checkbox"/> |           |
| 8.                                                         | Household average monthly income during the last year? গত বছর পরিবারের (খানা) গড় মাসিক আয় কত ছিল?                                                                                                                                                                                                                                                                      | ----- Taka/month [টাকা/প্রতি মাসে]                                                                                                                                                                                                                                                                                                                                                                                  |                          |           |
| 9.                                                         | What is the education qualification of you/patient? [আপনার /রোগীর শিক্ষাগত যোগ্যতা কী? ]                                                                                                                                                                                                                                                                                 | Never went to school [কখনো স্কুলে যাইনি]-----1<br>Primary (Below class 5) [৫ম শ্রেণীর আগ পর্যন্ত] -----2<br>Primary (Passed class 5) [৫ম শ্রেণী পাশ]-----3<br>Secondary (Class 6-10/Passed) [মাধ্যমিক (৬ষ্ঠ থেকে ১০ম/পাশ)] ----- 4<br>Higher secondary (Class twelve /Passed) [উচ্চ মাধ্যমিক (১২ তম শ্রেণী/পাশ)] ----- 5<br>Higher education [উচ্চ শিক্ষা]----- 6<br>Others (specify) [(অন্যান্য, উল্লেখ করুন)]-- 9 | <input type="checkbox"/> |           |
| <b>History of Previous Illness (পূর্ব অসুস্থতার বিবরণ)</b> |                                                                                                                                                                                                                                                                                                                                                                          |                                                                                                                                                                                                                                                                                                                                                                                                                     |                          |           |
| 10.                                                        | Do you/patient had the history of following illness [আপনার/রোগীর কি নিচের রোগগুলোর কোনটি ছিলো?]                                                                                                                                                                                                                                                                          | Yes (হ্যাঁ) ..... 1<br>No (না) ..... 2                                                                                                                                                                                                                                                                                                                                                                              |                          |           |
| a.                                                         | Angina/Chest Pain (এনজাইনা/বুকে ব্যাথা)                                                                                                                                                                                                                                                                                                                                  |                                                                                                                                                                                                                                                                                                                                                                                                                     | <input type="checkbox"/> |           |
| b.                                                         | Prior myocardial infarction (মায়োকার্ডিয়াল ইনফার্কশন)                                                                                                                                                                                                                                                                                                                  |                                                                                                                                                                                                                                                                                                                                                                                                                     | <input type="checkbox"/> |           |
| c.                                                         | Diabetes (ডায়াবেটিস)                                                                                                                                                                                                                                                                                                                                                    |                                                                                                                                                                                                                                                                                                                                                                                                                     | <input type="checkbox"/> |           |
| d.                                                         | Hypertension (উচ্চ রক্তচাপ)                                                                                                                                                                                                                                                                                                                                              |                                                                                                                                                                                                                                                                                                                                                                                                                     | <input type="checkbox"/> |           |
| e.                                                         | Heart Failure (হার্ট ফেল)                                                                                                                                                                                                                                                                                                                                                |                                                                                                                                                                                                                                                                                                                                                                                                                     | <input type="checkbox"/> |           |
| f.                                                         | Hyperlipidemia (রক্তে চর্বি'র পরিমাণ বেড়ে যাওয়া)                                                                                                                                                                                                                                                                                                                       |                                                                                                                                                                                                                                                                                                                                                                                                                     | <input type="checkbox"/> |           |
| g.                                                         | Prior stroke or transient ischemic attack (পূর্বের স্ট্রোক)                                                                                                                                                                                                                                                                                                              |                                                                                                                                                                                                                                                                                                                                                                                                                     | <input type="checkbox"/> |           |

| SL # | Question                                                                                                                                                                                                                                                                                                                                                                                                      | Code                                                                                                                                                               | Result                              | Skip code                       |                                              |                                             |                                   |                                                |                          |
|------|---------------------------------------------------------------------------------------------------------------------------------------------------------------------------------------------------------------------------------------------------------------------------------------------------------------------------------------------------------------------------------------------------------------|--------------------------------------------------------------------------------------------------------------------------------------------------------------------|-------------------------------------|---------------------------------|----------------------------------------------|---------------------------------------------|-----------------------------------|------------------------------------------------|--------------------------|
|      | <b>Risk Factors (ঝুঁকির কারণসমূহ)</b>                                                                                                                                                                                                                                                                                                                                                                         |                                                                                                                                                                    |                                     |                                 |                                              |                                             |                                   |                                                |                          |
| 11.  | <b>Smoking [ধূমপান] :</b><br>Now I am going to ask your/patient's smoking (cigarette, beeri, etc.) habit. Answer these questions if you/patient are a current smoker or if you/patient have ever smoked in the past:<br>[এখন আমি আপনাকে ধূমপান বিষয়ক (যেমন- সিগারেট, বিড়ি ইত্যাদি সম্পর্কে) কিছু প্রশ্ন করব। যদি আপনি /রোগী বর্তমানে ধূমপায়ী হন অথবা পূর্বে ধূমপান করে থাকেন তাহলে প্রশ্নগুলির উত্তর দিন।] |                                                                                                                                                                    |                                     |                                 |                                              |                                             |                                   |                                                |                          |
|      | <b>Type/ ধরণ</b>                                                                                                                                                                                                                                                                                                                                                                                              | <b>a.</b><br>1=Yes /হ্যাঁ<br>2= No/না                                                                                                                              | <b>b.</b><br>User /ব্যবহারকারী      | <b>c.</b><br>Daily<br>/দৈনিক    | <b>d.</b><br>Occasionally<br>/মঝঝমঝ          | <b>e.</b><br>Start<br>/শুরু                 | <b>f.</b><br>Quit<br>/ছেড়ে দেয়া | <b>g.</b><br>Total<br>Duration<br>/মোট সময়কাল |                          |
|      |                                                                                                                                                                                                                                                                                                                                                                                                               | <i>If `2 = No, then skip to the next question</i><br>[যদি উত্তর '2= না হয়, তাহলে পরবর্তী প্রশ্নে চলে যান]                                                         | <b>b1.</b><br>Current<br>[বর্তমানে] | <b>b2.</b><br>Former<br>[অতীতে] | <b>Sticks / Day</b><br>[দিনে কয়টি বা কতবার] | <b>Sticks/ Day</b><br>[দিনে কয়টি বা কতবার] | <b>Age</b><br>/বয়স               | <b>Age</b><br>/বয়স                            | <b>Age Years</b><br>/বছর |
| a.   | Cigarette/ সিগারেট                                                                                                                                                                                                                                                                                                                                                                                            |                                                                                                                                                                    |                                     |                                 |                                              |                                             |                                   |                                                |                          |
| b.   | Beeri/ বিড়ি                                                                                                                                                                                                                                                                                                                                                                                                  |                                                                                                                                                                    |                                     |                                 |                                              |                                             |                                   |                                                |                          |
| c.   | Hukka/হুকা                                                                                                                                                                                                                                                                                                                                                                                                    |                                                                                                                                                                    |                                     |                                 |                                              |                                             |                                   |                                                |                          |
| d.   | Gul/ গুল                                                                                                                                                                                                                                                                                                                                                                                                      |                                                                                                                                                                    |                                     |                                 |                                              |                                             |                                   |                                                |                          |
| e.   | Jarda /জর্দা                                                                                                                                                                                                                                                                                                                                                                                                  |                                                                                                                                                                    |                                     |                                 |                                              |                                             |                                   |                                                |                          |
| f.   | Tamak/ তামাক                                                                                                                                                                                                                                                                                                                                                                                                  |                                                                                                                                                                    |                                     |                                 |                                              |                                             |                                   |                                                |                          |
| 12.  | <b>Diet /খাদ্যাভ্যাস</b>                                                                                                                                                                                                                                                                                                                                                                                      |                                                                                                                                                                    |                                     |                                 |                                              |                                             |                                   |                                                |                          |
| a.   | In a typical week, on how many days do you/patient eat fruit? [সচরাচর সপ্তাহের কতদিন আপনি/রোগী ফল খান/খেতেন ?]                                                                                                                                                                                                                                                                                                | ____ number of days/ দিন<br>Don't Know /জানি না ..... 77                                                                                                           |                                     |                                 |                                              | <input type="text"/> <input type="text"/>   |                                   |                                                |                          |
| b.   | How many servings of fruit do you/patient eat on one of those days? [সেসব দিনে মোট কতবার আপনি/রোগী ফল খান/খেতেন?]                                                                                                                                                                                                                                                                                             | ____ number of servings / টি পরিবেশন                                                                                                                               |                                     |                                 |                                              | <input type="text"/> <input type="text"/>   |                                   |                                                |                          |
| c.   | In a typical week, on how many days do you eat vegetables? [সচরাচর সপ্তাহের কতদিন আপনি/রোগী শাক-সবজি খান/খেতেন ?]                                                                                                                                                                                                                                                                                             | ____ number of days/ দিন<br>Don't Know /জানি না ..... 77                                                                                                           |                                     |                                 |                                              | <input type="text"/> <input type="text"/>   |                                   |                                                |                          |
| d.   | How many servings of vegetables do you/patient eat on one of those days? [সেসব দিনে মোট কতবার আপনি/রোগী শাক-সবজির খান/খেতেন ?]                                                                                                                                                                                                                                                                                | ____ number of servings/ টি পরিবেশন                                                                                                                                |                                     |                                 |                                              | <input type="text"/> <input type="text"/>   |                                   |                                                |                          |
| e.   | How often do you/patient add salt in the foods right before eating? [সচরাচর খাবার খাওয়ার ঠিক আগ মুহূর্তে আপনি/রোগী কি কখনো পাতে আলগা লবণ নেন/নিতেন ?]                                                                                                                                                                                                                                                        | Always সবসময় ----- 1<br>Often প্রায়শই ----- 2<br>Sometime কখনো কখনো ----- 3<br>Rarely খুবই কম সময়----- 4<br>Never কখনই না ----- 5<br>Don't know জানি না ----- 7 |                                     |                                 |                                              | <input type="text"/>                        |                                   |                                                |                          |
| f.   | How often do you/patient added salt in cooking or preparing foods in the household? [আপনার/রোগী খাবার রান্না/তৈরি করার সময় লবণ ব্যবহার করা হয়?]                                                                                                                                                                                                                                                             | Always সবসময় ----- 1<br>Often প্রায়শই ----- 2<br>Sometime কখনো কখনো ----- 3<br>Rarely খুবই কম সময়----- 4<br>Never কখনই না ----- 5<br>Don't know জানি না ----- 7 |                                     |                                 |                                              | <input type="text"/>                        |                                   |                                                |                          |

| SL #                                                                                               | Question                                                                                                                                                                                                                                          | Code                                                                                                                                                                                                             | Result                   | Skip code |
|----------------------------------------------------------------------------------------------------|---------------------------------------------------------------------------------------------------------------------------------------------------------------------------------------------------------------------------------------------------|------------------------------------------------------------------------------------------------------------------------------------------------------------------------------------------------------------------|--------------------------|-----------|
| g.                                                                                                 | How much salt do you think you/patient consume? [আপনি/রোগী কতটুকু লবণ খান বলে আপনি মনে করেন?]                                                                                                                                                     | Far too much অনেক অনেক বেশী ----- 1<br>Too much অনেক বেশী----- 2<br>Just the right amount [ঠিক পরিমাণমতো] ----- 3<br>Too little খুব কম----- 4<br>Far too little অতিরিক্ত কম----- 5<br>Don't know জানি না ----- 7 | <input type="checkbox"/> |           |
| <b>History of raised Blood pressure &amp; Diabetes/ উচ্চ রক্তচাপ এবং ডায়েবিটিস সংক্রান্ত তথ্য</b> |                                                                                                                                                                                                                                                   |                                                                                                                                                                                                                  |                          |           |
| 13.                                                                                                | Have you/patient ever had your/patient blood pressure measured by a doctor or other health worker? আপনি/রোগী কি কখনো ডাক্তার বা অন্য স্বাস্থ্যকর্মীর কাছে রক্তচাপ পরীক্ষা করিয়েছেন ?                                                             | Yes (হ্যাঁ) ..... 1<br>No (না) ..... 2                                                                                                                                                                           | <input type="checkbox"/> |           |
|                                                                                                    | 13.a. If Yes who measure (যদি হ্যাঁ হয় তবে কে পরিমাপ করেছিলেন)                                                                                                                                                                                   | _____                                                                                                                                                                                                            |                          |           |
| 14.                                                                                                | Have you/patient ever had your/patient blood pressure measured by a doctor or other health worker before stroke/MI? স্ট্রোক বা এম.আই হবার আগে কি আপনি/রোগী একজন ডাক্তার বা অন্য স্বাস্থ্যকর্মীর কাছে রক্তচাপ পরীক্ষা করিয়েছিলেন ?                | Yes (হ্যাঁ) ..... 1<br>No (না) ..... 2                                                                                                                                                                           | <input type="checkbox"/> |           |
|                                                                                                    | 14.a. If Yes who measure (যদি হ্যাঁ হয় তবে কে পরিমাপ করেছিলেন)                                                                                                                                                                                   | _____                                                                                                                                                                                                            |                          |           |
| 15.                                                                                                | Have you/patient ever been told by a doctor or other health worker that You/patient have raised blood pressure/hypertension? আপনাকে/রোগীকে কি কখনো কোন ডাক্তার বা অন্য স্বাস্থ্যকর্মী বলেছেন যে উচ্চ রক্তচাপ আছে ?                                | Yes (হ্যাঁ) ..... 1<br>No (না) ..... 2                                                                                                                                                                           | <input type="checkbox"/> |           |
|                                                                                                    | 15.a. If Yes who told (যদি হ্যাঁ হয় তবে কে বলেছিলেন)                                                                                                                                                                                             | _____                                                                                                                                                                                                            |                          |           |
| 16.                                                                                                | Are you currently /was the patient taking any medication for hypertension? আপনি/রোগী কি উচ্চ রক্তচাপ নিয়ন্ত্রণের কোন ঔষধ খাচ্ছেন/খেতেন?                                                                                                          | Yes (হ্যাঁ) ..... 1<br>No (না) ..... 2                                                                                                                                                                           | <input type="checkbox"/> |           |
| 17.                                                                                                | Have you/patient ever had your/ patient blood sugar measured by a doctor or other health worker? আপনি/রোগী কি কখনো ডাক্তার বা অন্য স্বাস্থ্যকর্মীর কাছে রক্তে চিনি/শর্করার (ডায়াবেটিস) পরিমাণ পরীক্ষা করিয়েছেন/ করিয়েছিলেন?                    | Yes (হ্যাঁ) ..... 1<br>No (না) ..... 2                                                                                                                                                                           | <input type="checkbox"/> |           |
|                                                                                                    | 17.a. If Yes who measure (যদি হ্যাঁ হয় তবে কে পরিমাপ করেছিলেন)                                                                                                                                                                                   | _____                                                                                                                                                                                                            |                          |           |
| 18.                                                                                                | Have you/patient ever had your/ patient blood sugar measured by a doctor or other health worker before stroke/MI? স্ট্রোক বা এম.আই হবার আগে কি আপনি/রোগী একজন ডাক্তার বা অন্য স্বাস্থ্যকর্মীর কাছে রক্তে চিনি/শর্করার পরিমাণ পরীক্ষা করিয়েছিলেন? | Yes (হ্যাঁ) ..... 1<br>No (না) ..... 2                                                                                                                                                                           | <input type="checkbox"/> |           |
|                                                                                                    | 18.a. If Yes who measure (যদি হ্যাঁ হয় তবে কে পরিমাপ করেছিলেন)                                                                                                                                                                                   | _____                                                                                                                                                                                                            |                          |           |

| SL #                                                    | Question                                                                                                                                                                                               | Code                                                                                                                                                                                                                                                                                                  | Result                   | Skip code                             |
|---------------------------------------------------------|--------------------------------------------------------------------------------------------------------------------------------------------------------------------------------------------------------|-------------------------------------------------------------------------------------------------------------------------------------------------------------------------------------------------------------------------------------------------------------------------------------------------------|--------------------------|---------------------------------------|
| 19.                                                     | Have you/patient ever been told by a doctor or other health worker that You/patient have Diabetes?<br>আপনাকে/রোগীকে কি কখনো কোন ডাক্তার বা অন্য স্বাস্থ্যকর্মী বলেছেন যে ডায়েবিটিস আছে ?              | Yes (হ্যাঁ) ..... 1<br>No (না) ..... 2                                                                                                                                                                                                                                                                | <input type="checkbox"/> |                                       |
|                                                         | 19.a. If Yes who told (যদি হ্যাঁ হয় তবে কে বলেছিলেন)                                                                                                                                                  | _____                                                                                                                                                                                                                                                                                                 |                          |                                       |
| 20.                                                     | Are you currently /was the patient taking any medication for diabetes? আপনি/রোগী কি ডায়েবিটিস নিয়ন্ত্রণের কোন ঔষধ খাচ্ছেন/খেতেন?                                                                     | Yes (হ্যাঁ) ..... 1<br>No (না) ..... 2                                                                                                                                                                                                                                                                | <input type="checkbox"/> |                                       |
| <b>Care Seeking/ স্বাস্থ্যসেবা গ্রহণ সংক্রান্ত তথ্য</b> |                                                                                                                                                                                                        |                                                                                                                                                                                                                                                                                                       |                          |                                       |
| 21.                                                     | When did you/patient get stroke/MI<br>আপনার/রোগীর স্ট্রোক/এম.আই কবে হয়েছিলো?                                                                                                                          | <input type="text"/> <input type="text"/><br><b>Day Month Year</b><br>দিন মাস বছর                                                                                       |                          |                                       |
|                                                         | 21.1. Time of attack অ্যাটাক কখন হয়েছিলো?                                                                                                                                                             | _ _ _ . _ _ _  am/pm                                                                                                                                                                                                                                                                                  |                          |                                       |
| 22.                                                     | When you/patient had stroke was you/h/she conscious? যখন স্ট্রোক/এম.আই হয়েছিলো তখন কি আপনি/রোগী চেতন অবস্থায় ছিলেন?                                                                                  | Yes (হ্যাঁ) ----- 1<br>No (না) ----- 2<br>Don't know (জানিনা) ----- 7                                                                                                                                                                                                                                 | <input type="checkbox"/> |                                       |
| 23.                                                     | When you/patient had stroke/MI were you living alone? যখন স্ট্রোক/এম.আই হয়েছিলো তখন কি আপনি/রোগী বাসায় একা ছিলেন?                                                                                    | Yes (হ্যাঁ) ..... 1<br>No (না) ..... 2                                                                                                                                                                                                                                                                | <input type="checkbox"/> |                                       |
| 24.                                                     | Did you/patient or any other family member recognize the symptoms of stroke/MI? স্ট্রোক/এম.আই হয়েছে এমন লক্ষণগুলো কি আপনি/রোগী বা পরিবারের অন্য কেউ বুঝতে পেরেছিলেন?                                  | Yes (হ্যাঁ) ----- 1<br>No (না) ----- 2<br>Don't know (জানিনা) ----- 7                                                                                                                                                                                                                                 | <input type="checkbox"/> |                                       |
| 25.                                                     | Did any household member/relative have stroke/MI before your/patient attack?<br>আপনার/রোগীর আগে পরিবারের অন্য কারো কি স্ট্রোক/এম.আই হয়েছিলো?                                                          | Yes (হ্যাঁ) ..... 1<br>No (না) ..... 2                                                                                                                                                                                                                                                                | <input type="checkbox"/> |                                       |
| 26.                                                     | When the attack happen do you/patient/any HH member consult with anyone to seek medical attention? যখন আপনার/রোগীর স্ট্রোক/এম.আই হলো তখন কি পরিবারের কেউ চিকিৎসার ব্যপারে কারো সাথে পরামর্শ করেছিলেন ? | Yes (হ্যাঁ) ..... 1<br>No (না) ..... 2                                                                                                                                                                                                                                                                | <input type="checkbox"/> | If Yes go to 26.a<br>If no go to 26.b |
|                                                         | 26.a. If yes, Whom did you consult?<br>যদি হ্যাঁ হয়, তবে কার সাথে পরামর্শ করেছিলেন ?                                                                                                                  | Physician ডাক্তার ----- 1<br>Any health care provider<br>কোন স্বাস্থ্যসেবা প্রদানকারী ----- 2<br>Any family member<br>পরিবারের কোন সদস্য ----- 3<br>Neighbour/nonrelatives প্রতিবেশী/আত্মীয় নয় এমন----- 4                                                                                           | <input type="checkbox"/> |                                       |
|                                                         | 26.b. If no, why? যদি না হয়, তবে কেন ?                                                                                                                                                                | Appraisal of symptoms as not being serious or urgent<br>[লক্ষণগুলো গুরুতর মনে হয়নি] ----- 1<br>Wait for symptoms to go away<br>[লক্ষণগুলো এমনি চলে যাবে বলে অপেক্ষা] ----- 2<br>Concern about troubling other [অন্যকে বামেলায় ফেলার উদ্বেগ] ----- 3<br>Other (Specify) অন্যান্য (উল্লেখ করুন)-----9 | <input type="checkbox"/> |                                       |

| SL # | Question                                                                                                                                                                                                                                                                                                             | Code                                                                                                                                                                                                                                                                                                                                                                                                                                                                                             | Result                   | Skip code |
|------|----------------------------------------------------------------------------------------------------------------------------------------------------------------------------------------------------------------------------------------------------------------------------------------------------------------------|--------------------------------------------------------------------------------------------------------------------------------------------------------------------------------------------------------------------------------------------------------------------------------------------------------------------------------------------------------------------------------------------------------------------------------------------------------------------------------------------------|--------------------------|-----------|
| 27.  | How long it took to make a decision to seek medical attention after the attack?<br>অ্যাটাকের কতক্ষণ পর মেডিক্যাল চিকিৎসা গ্রহণের সিদ্ধান্ত নেয়া হয়েছিলো ?                                                                                                                                                          | ____ ____  hour ঘন্টা ____ ____  minute মিনিট                                                                                                                                                                                                                                                                                                                                                                                                                                                    |                          |           |
|      | 27.a. Did he/she die at home before seeking medical attention? (ask only for fatal stroke/MI cases) (শুধুমাত্র প্রাণনাশক স্ট্রোক/এম.আই-এর ক্ষেত্রে) রোগী কি কোন ধরনের চিকিৎসা নেবার আগেই বাড়িতেই মারা গিয়েছিলো?                                                                                                    | Yes (হ্যাঁ) ..... 1<br>No (না) ..... 2                                                                                                                                                                                                                                                                                                                                                                                                                                                           | <input type="checkbox"/> |           |
| 28.  | What kind of medical contact did you/patient made? আপনি/রোগী কী ধরনের চিকিৎসা নিয়েছিলেন?                                                                                                                                                                                                                            | Took the patient to nearest medical facilities রোগীকে নিকটবর্তী স্বাস্থ্যসেবাকেন্দ্রে নিয়ে যাওয়া ----- 1<br>Took the patient directly to specialist hospital রোগীকে সরাসরি বিশেষায়িত হাসপাতালে নিয়ে যাওয়া ----- 2<br>Bring a qualified physician at home অভিজ্ঞ ডাক্তারকে বাসায় নিয়ে আসা ----- 3<br>Bring any other health care provider at home অন্য কোন স্বাস্থ্যসেবা প্রদানকারীকে বাসায় নিয়ে আসা ----- 4<br>No medical contact (কোন চিকিৎসা বা স্বাস্থ্যসেবা গ্রহন করা হয়নি)----- 5 | <input type="checkbox"/> |           |
|      | 28a. What was the reason for not taking any medical contact (কোন চিকিৎসা বা স্বাস্থ্যসেবা গ্রহন না করার কারণ কি ছিল?)                                                                                                                                                                                                |                                                                                                                                                                                                                                                                                                                                                                                                                                                                                                  |                          |           |
| 29.  | How long it took to make first medical contact after the attack?<br>অ্যাটাক হবার পর প্রথম মেডিক্যাল চিকিৎসা পেতে কতক্ষণ সময় লেগেছিলো ?                                                                                                                                                                              | ____ ____  hour ঘন্টা ____ ____  minute মিনিট                                                                                                                                                                                                                                                                                                                                                                                                                                                    |                          |           |
|      | 29.1. Did he/she die in-between decision to seek care and first medical contact and? (ask only for fatal stroke/MI cases) (শুধুমাত্র প্রাণনাশক স্ট্রোক/এম.আই-এর ক্ষেত্রে) চিকিৎসা নেবার সিদ্ধান্ত গ্রহণ এবং চিকিৎসা পাওয়ার মধ্যবর্তী সময়ে কি রোগী মারা গিয়েছিলো?                                                  | Yes (হ্যাঁ) ..... 1<br>No (না) ..... 2                                                                                                                                                                                                                                                                                                                                                                                                                                                           | <input type="checkbox"/> |           |
| 30.  | What mode of transport did you/patient used to reach fist medical contact? (if qualified provider/other healthcare worker brought at home what mode of transport was used for him/her transport) আপনাকে/রোগীকে চিকিৎসার জন্য নিয়ে যেতে, বা ডাক্তার/স্বাস্থ্যসেবীকে বাসায় নিয়ে আসতে কোন যানবাহন ব্যবহৃত হয়েছিলো ? | Ambulance অ্যাম্বুলেন্স ----- 1<br>Rickshaw/VAN রিকশা/ভ্যান ----- 2<br>CNG auto rickshaw সি.এন.জি অটো রিকশা ----- 3<br>Other অন্যান্য ----- 9                                                                                                                                                                                                                                                                                                                                                    | <input type="checkbox"/> |           |
|      | 30.1. Cost of Transpiration<br>যাতায়াত বাবদ খরচ                                                                                                                                                                                                                                                                     | ----- Taka/month টাকা/প্রতি মাসে                                                                                                                                                                                                                                                                                                                                                                                                                                                                 |                          |           |
|      | [যদি প্রশ্ন ২৮-এর উত্তর ৩ বা ৪ হয়→৩১] [যদি প্রশ্ন ২৮-এর উত্তর ১ বা ২ হয় তাহলে →৩৮]                                                                                                                                                                                                                                 |                                                                                                                                                                                                                                                                                                                                                                                                                                                                                                  |                          |           |
| 31.  | Was qualified provider/other healthcare worker give any treatment at home? দক্ষ স্বাস্থ্যসেবাকর্মী কি বাসায় এসে কোন চিকিৎসা দিয়েছিলেন ?                                                                                                                                                                            | Yes (হ্যাঁ) ..... 1<br>No (না) ..... 2                                                                                                                                                                                                                                                                                                                                                                                                                                                           | <input type="checkbox"/> |           |

| SL #                                   | Question                                                                                                                                                                                                         | Code                                                                                                                                                                                                                                                                               | Result                                                                           | Skip code               |
|----------------------------------------|------------------------------------------------------------------------------------------------------------------------------------------------------------------------------------------------------------------|------------------------------------------------------------------------------------------------------------------------------------------------------------------------------------------------------------------------------------------------------------------------------------|----------------------------------------------------------------------------------|-------------------------|
| 32.                                    | How long it took to initiate treatment at home after the attack? অ্যাটাকের কতক্ষণ পর চিকিৎসা শুরু করা হয়েছিলো ?                                                                                                 | ____ ____  hour ঘন্টা  ____ ____  minute মিনিট                                                                                                                                                                                                                                     |                                                                                  |                         |
| 33.                                    | What kind of treatment provided at home? বাসায় কী ধরনের চিকিৎসা দেয়া হয়েছিলো ?                                                                                                                                | Medication ঔষধ ----- 1<br>Injection/IV infusion ইন্জেকশন----- 2<br>Other (Specify) অন্যান্য (উল্লেখ করুন) ----- 9                                                                                                                                                                  |                                                                                  |                         |
| 34.                                    | Were you/patient referred by the provider/other healthcare worker to any medical facilities from home? সেই স্বাস্থ্যসেবাকর্মী কি আপনাকে/রোগীকে কোন স্বাস্থ্যসেবাকেন্দ্রে যাবার জন্য রেফার করেছিলেন?              | Yes (হ্যাঁ) ..... 1<br>No (না) ..... 2                                                                                                                                                                                                                                             | <input type="checkbox"/>                                                         | If NO then move to Q.37 |
| 35.                                    | What kind of facility he/she referred? কোন ধরনের স্বাস্থ্যসেবাকেন্দ্রে তিনি রেফার করেছিলেন?                                                                                                                      | Upazila Health complex উপজেলা স্বাস্থ্য কমপ্লেক্স ----- 1<br>District hospital জেলা হাসপাতাল ----- 2<br>Medical college/tertiary care facilities মেডিকেল কলেজ/টারশিয়ারি সেবাকেন্দ্র ----- 3<br>Private facilities বেসরকারী স্বাস্থ্যসেবাকেন্দ্র ----- 4<br>Other অন্যান্য ----- 9 | <input type="checkbox"/>                                                         |                         |
| 36.                                    | Name of the facility স্বাস্থ্যসেবাকেন্দ্রের নাম                                                                                                                                                                  | _____                                                                                                                                                                                                                                                                              |                                                                                  |                         |
| 37.                                    | Cost of Treatment at home (inclusive of provider fee/medication charge etc.) বাসায় চিকিৎসা নেওয়া বাবদ খরচ (স্বাস্থ্যসেবাকর্মীর ফী, ঔষধ ইত্যাদি সহ)                                                             | ----- Taka/month টাকা/প্রতি মাসে                                                                                                                                                                                                                                                   |                                                                                  |                         |
| [যদি প্রশ্ন ২৮-এর উত্তর ১ বা ২ হয়→৩৮] |                                                                                                                                                                                                                  |                                                                                                                                                                                                                                                                                    |                                                                                  |                         |
| 38.                                    | How long it took to hospital arrival after the attack? অ্যাটাকের পর হাসপাতাল পৌঁছাতে কত সময় লেগেছিলো?                                                                                                           | ____ ____  hour ঘন্টা  ____ ____  minute মিনিট                                                                                                                                                                                                                                     |                                                                                  |                         |
|                                        | 38.1. Did he/she die during transportation to the health facility? (ask only for fatal stroke/MI cases) (শুধুমাত্র প্রাণনাশক স্ট্রোক/এম.আই-এর ক্ষেত্রে) স্বাস্থ্যসেবাকেন্দ্রে যাবার পথেই কি রোগী মারা গিয়েছিলো? | Yes (হ্যাঁ) ..... 1<br>No (না) ..... 2                                                                                                                                                                                                                                             | <input type="checkbox"/>                                                         |                         |
| 39.                                    | What kind of facility was that? সেটি কোন ধরনের স্বাস্থ্যসেবাকেন্দ্র ছিলো?                                                                                                                                        | Upazila Health complex উপজেলা স্বাস্থ্য কমপ্লেক্স ----- 1<br>District hospital জেলা হাসপাতাল ----- 2<br>Medical/tertiary care facilities মেডিকেল টারশিয়ারি সেবাকেন্দ্র ----- 3<br>Private facilities বেসরকারী স্বাস্থ্যসেবাকেন্দ্র ----- 4<br>Other অন্যান্য ----- 9              | <input type="checkbox"/>                                                         |                         |
| 40.                                    | What kind of service you/patient received at the facilities hospital? হাসপাতালে আপনি/রোগী কোন ধরনের সেবা পেয়েছিলেন ?                                                                                            | Screening.....1<br>Admission.....2<br>Initial Management.....3<br>Complete treatment.....4<br>Referred.....5                                                                                                                                                                       | <input type="checkbox"/><br><input type="checkbox"/><br><input type="checkbox"/> |                         |

| SL #                                            | Question                                                                                                                                                                                                                   | Code                                                                                                                                                           | Result                                               | Skip code |
|-------------------------------------------------|----------------------------------------------------------------------------------------------------------------------------------------------------------------------------------------------------------------------------|----------------------------------------------------------------------------------------------------------------------------------------------------------------|------------------------------------------------------|-----------|
|                                                 |                                                                                                                                                                                                                            | Declared dead with initial screening.....6<br>Sent home.....7                                                                                                  | <input type="checkbox"/><br><input type="checkbox"/> |           |
| 41.                                             | What kind of treatment provided at first facility? প্রথম যেই স্বাস্থ্যসেবাকেন্দ্রে গিয়েছিলেন তাতে কোন ধরনের চিকিৎসা পেয়েছিলেন?                                                                                           | Medication ঔষধ ----- 1<br>Injection/IV infusion ইন্জেকশন----- 2<br>Screening only শুধুমাত্র স্ক্রিনিং ----- 3<br>Other (Specify) অন্যান্য (উল্লেখ করুন)----- 9 | <input type="checkbox"/>                             |           |
|                                                 | Please write the treatment/referral note (If available)<br>দয়া করে চিকিৎসা এবং রেফারেল নোটটি লিখুন (যদি থাকে)                                                                                                             |                                                                                                                                                                |                                                      |           |
| 42.                                             | How long it took to initiate treatment at the first facility after attack? অ্যাটাকের পর প্রথম স্বাস্থ্যসেবাকেন্দ্রে চিকিৎসা শুরু করতে কত সময় লেগেছিলো ?                                                                   | _ _  hour ঘন্টা  _ _  minute মিনিট                                                                                                                             |                                                      |           |
| 43.                                             | Cost of Treatment at first facility (inclusive of user fee/medication cost charge etc.) প্রথম স্বাস্থ্যসেবাকেন্দ্রে চিকিৎসা বাবদ খরচ (ভর্তি ফী/ ঔষধ ইত্যাদি সহ)                                                            | ----- Taka/month টাকা/প্রতি মাসে                                                                                                                               |                                                      |           |
| <b>[If Q.40 is 5→44] [If Q.40 is 6/7 →Q.50]</b> |                                                                                                                                                                                                                            |                                                                                                                                                                |                                                      |           |
| 44.                                             | How did you/Patient transferred to the referred facilities রোগীকে যেখানে রেফার করা হয়েছিলো সেখানে কীভাবে স্থানান্তর করা হয়েছিলো ?                                                                                        | Ambulance অ্যাম্বুলেন্স ----- 1<br>Rickshaw/VAN রিকশা/ভ্যান ----- 2<br>CNG auto rickshaw সি.এন.জি অটো রিকশা ----- 3<br>Other অন্যান্য ----- 9                  | <input type="checkbox"/>                             |           |
| 45.                                             | How long it took to the referred facility? রেফারকৃত স্বাস্থ্যকেন্দ্রে নিয়ে যেতে কত সময় লেগেছিলো ?                                                                                                                        | _ _  hour ঘন্টা  _ _  minute মিনিট                                                                                                                             |                                                      |           |
| 46.                                             | 46.1 Did he/she die during transportation to the referred facility? (ask only for fatal stroke/MI cases) (শুধুমাত্র প্রাণনাশক স্ট্রোক/এম.আই-এর ক্ষেত্রে) রেফারকৃত স্বাস্থ্যসেবাকেন্দ্রে যাবার পথেই কি রোগী মারা গিয়েছিলো? | Yes (হ্যাঁ) ..... 1<br>No (না) ..... 2                                                                                                                         | <input type="checkbox"/>                             |           |
| 47.                                             | How long it took to initiate treatment at the facility after attack? অ্যাটাকের পর রেফারকৃত স্বাস্থ্যসেবাকেন্দ্রে চিকিৎসা শুরু করতে কত সময় লেগেছিলো?                                                                       | _ _  hour ঘন্টা  _ _  minute মিনিট                                                                                                                             |                                                      |           |
| 48.                                             | Please write the detail treatment history (Please review medical record if available)<br>দয়া করে চিকিৎসার বিস্তারিত বিবরণ লিখুন (যদি মেডিকাল রেকর্ড থাকে তবে তা পড়ে লিখুন)                                               |                                                                                                                                                                |                                                      |           |





| SL #                                                                                       | Question                                                                                                                                                           | Code                                   | Result                                                                             | Skip code                       |                              |                                               |                      |                   |
|--------------------------------------------------------------------------------------------|--------------------------------------------------------------------------------------------------------------------------------------------------------------------|----------------------------------------|------------------------------------------------------------------------------------|---------------------------------|------------------------------|-----------------------------------------------|----------------------|-------------------|
| 51.                                                                                        | Are you currently taking any medication (only for non fatal stroke/MI)? আপনি কি বর্তমানে কোন ঔষধ সেবন করছেন (শুধুমাত্র জীবিত প্রাণনাশক স্ট্রোক/এম.আই-এর ক্ষেত্রে)? | Yes (হ্যাঁ) ..... 1<br>No (না) ..... 2 | <input type="checkbox"/>                                                           |                                 |                              |                                               |                      |                   |
| If yes, please write down the name of medicines যদি হ্যাঁ হয়, তবে ঔষধগুলোর নাম নিচে লিখুন |                                                                                                                                                                    |                                        |                                                                                    |                                 |                              |                                               |                      |                   |
|                                                                                            | Medication name<br>ঔষধের নাম                                                                                                                                       | Power<br>পাওয়ার                       | Formulation<br>Tablet ট্যাবলেট =1<br>Capsule ক্যাপসুল = 2<br>Injection ইন্জেকশন =3 | Times/<br>day<br>দিনে<br>কয়বার | Numbers/<br>day<br>দিনে কতটি | Regular<br>medication<br>নিয়মিত সেবন<br>করেন | Yes<br>=1<br>হ্যাঁ=১ | No<br>= 2<br>না=২ |
| 51.1                                                                                       |                                                                                                                                                                    |                                        |                                                                                    |                                 |                              |                                               |                      |                   |
| 51.2                                                                                       |                                                                                                                                                                    |                                        |                                                                                    |                                 |                              |                                               |                      |                   |
| 51.3                                                                                       |                                                                                                                                                                    |                                        |                                                                                    |                                 |                              |                                               |                      |                   |
| 51.4                                                                                       |                                                                                                                                                                    |                                        |                                                                                    |                                 |                              |                                               |                      |                   |
| 51.5                                                                                       |                                                                                                                                                                    |                                        |                                                                                    |                                 |                              |                                               |                      |                   |
| 51.6                                                                                       |                                                                                                                                                                    |                                        |                                                                                    |                                 |                              |                                               |                      |                   |
| 51.7                                                                                       |                                                                                                                                                                    |                                        |                                                                                    |                                 |                              |                                               |                      |                   |
| 51.8                                                                                       |                                                                                                                                                                    |                                        |                                                                                    |                                 |                              |                                               |                      |                   |
| <b>Thank you for your participation.</b><br>অংশগ্রহণ করার জন্য আপনাকে অসংখ্য ধন্যবাদ।      |                                                                                                                                                                    |                                        |                                                                                    |                                 |                              |                                               |                      |                   |
| <b>Interviewer's Comments</b>                                                              |                                                                                                                                                                    |                                        |                                                                                    |                                 |                              |                                               |                      |                   |
| <p><b>Name:</b> _____ <b>Signature</b> _____ <b>Date:</b> _____</p>                        |                                                                                                                                                                    |                                        |                                                                                    |                                 |                              |                                               |                      |                   |
