# Supplementary material for: Access to primary health care for acute vascular events in rural low income settings: a mixed methods study
Source: Springer Nature journal article supplement (doi:10.1186/s12913-017-1987-8), 2017-01-17
Supplement: MOESM3 [file 12005608]

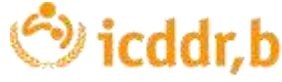

## Qualitative interview guidelines

### In-depth Interview Guideline for the survivors and caregivers of Stroke or MI:

১. During Event / অ্যাটাক হবার সময়
  - a. History of the acute vascular events /একিউট ভাস্কুলার ইভেন্ট সংক্রান্ত তথ্য
  - b. Recognition of symptoms/ লক্ষণগুলো চিনতে পারা
  - c. First medical contact / প্রথম মেডিকাল চিকিৎসা নেয়া
  - d. Perception of necessities of care seeking/ চিকিৎসা গ্রহণের ব্যাপারে দৃষ্টিভঙ্গি/মতামত
  - e. Decision maker of care seeking/ চিকিৎসা গ্রহণের সিদ্ধান্ত যিনি নেন
  - f. Transportation use to seek care/ চিকিৎসা নিতে যাবার যানবাহন ব্যবস্থা
2. Care seeking behaviour / চিকিৎসা গ্রহণের ধরণ
  - a. Facilities visited/ যেই যেই স্বাস্থ্যসেবাকেন্দ্রে গিয়েছেন
  - b. Treatment received/ যা চিকিৎসা পেয়েছেন
  - c. Any obstruction encountered during care seeking / চিকিৎসা পেতে যা যা অসুবিধা হয়েছিলো
    - Delay in seeking care/ চিকিৎসা নিতে দেরী হওয়া
    - Financial constrains/ আর্থিক সংকট
    - Transport problem/ যাতায়াতের অসুবিধা
    - Delay in starting the management/ চিকিৎসা শুরুতে দেরী
    - Lack of institutional support/ প্রাতিষ্ঠানিক সহায়তার অভাব
    - Absence of following up/ ফলো-আপের অভাব
  - d. Any financial constrain/ কোনরকম আর্থিক সংকট
3. Post Events / অ্যাটাক পরবর্তী সময়ে
  - a. Life after the event/ এরপরের জীবন
  - b. Current treatment/ বর্তমানে যা যা চিকিৎসা পাচ্ছেন
  - c. Lifestyle changes/ জীবনযাপনে যা যা পরিবর্তন এসেছে
  - d. Coping with financial and other needs needs/ আর্থিক বা অন্যান্য চাহিদা যেভাবে মেটানো হচ্ছে
4. Barriers to access care/ চিকিৎসা পেতে বাধা
  - a. Personal Barrier/ ব্যক্তিগত বাধা
    - Perceived need/ প্রয়োজন আছে কি না সে সম্পর্কে অভিমত
    - Quality of care/ চিকিৎসা সেবার মান
    - Perception of adequacy of the services and staff at PHC/ প্রাথমিক স্বাস্থ্যসেবাকেন্দ্রে সেবা ও কর্মচারীর পর্যাপ্ততা সম্পর্কে মতামত

- Accessibility issues including distance transport, proximity of the PHC etc./  
প্রাথমিক স্বাস্থ্যসেবাকেন্দ্রে পৌঁছাতে যা যা সমস্যা (দূরত্ব, যানবাহন ইত্যাদি সহ)
- b. Financial Barriers/ আর্থিক সমস্যা
- Fee of service/ চিকিৎসা সেবার দাম
  - Out of pocket expenditure / নিজের খরচে সেবা নেওয়া
  - Charges for other services/ অন্যান্য সেবা পেতে খরচ
5. Factors that may affect utilization (Facilitators & Barriers)/ চিকিৎসা সেবা নিবার ক্ষেত্রে যেই বিষয়গুলো প্রভাব ফেলে (সুবিধা এবং অসুবিধা)

### For the High level official/managers/policy makers:

1. Current services available for managing acute vascular events (Stroke and MI) at the primary care level / বর্তমানে প্রাথমিক স্বাস্থ্যসেবা কেন্দ্রগুলোতে একিউট ভাস্কুলার ইভেন্টের (স্ট্রোক/এম.আই) চিকিৎসার জন্য যা যা সেবা রয়েছে
  - Skilled Human Resource/ দক্ষ কর্মী
  - Necessary/ appropriate drugs প্রয়োজনীয় ঔষধপত্র
  - Equipments / সরঞ্জামাদি
  - Logistics
2. Adequacy of the service to cover rural population / গ্রামীণ জনগোষ্ঠীর স্বাস্থ্যসেবা দেয়ার ক্ষেত্রে এই সেবাগুলো পর্যাপ্ত কি না
3. Barriers from providers perspective / স্বাস্থ্যসেবা প্রদানকারীর মতে কি কি বাধা আছে
  - Skilled human resource / দক্ষ কর্মী
  - Guidelines for treatment / চিকিৎসার জন্য গাইডলাইন
  - Infrastructures (logistics, equipments) / অবকাঠামো
  - Supply of essential drugs/ প্রয়োজনীয় ঔষধ সরবরাহ
  - Community awareness about the service availability/ সেবা সম্পর্কে জনগণের সচেতনতার অভাব
  - Financial constrain of the patients/ রোগীদের আর্থিক সংকট
4. Action required to strengthen the existing primary care facilities for acute vascular events / প্রাথমিক স্বাস্থ্যসেবা কেন্দ্রগুলোতে একিউট ভাস্কুলার ইভেন্টের চিকিৎসা জোরদার করতে কি কি পদক্ষেপ নেয়া দরকার
  - From government level/ সরকারী পর্যায়ে
  - From NGO's and private level/ এনজিও এবং বেসরকারী পর্যায়ে
  - From community level/ এলাকায় বা সামাজিকভাবে
